# Supplementary material for: Unravelling the role of dopants in the electrocatalytic activity of ceria towards CO2 reduction in solid oxide electrolysis cells
Source: Royal Society of Chemistry journal article supplement (doi:10.1039/d2cp05157e), 2023-01-01
Supplement: d2cp05157e1.pdf [file d2cp05157e1.pdf]

# Unravelling the role of dopants in the electrocatalytic activity of ceria towards CO<sub>2</sub> reduction in Solid Oxide Electrolysis Cells

*Elena Marzia Sala, Nicola Mazzanti, Francesco M. Chiabrera<sup>†</sup>, Simone Sanna<sup>§</sup>, Mogens B.  
Mogensen, Peter V. Hendriksen, Zhongtao Ma, Søren B. Simonsen, Christodoulos  
Chatzichristodoulou\**

Department of Energy Conversion and Storage, Technical University of Denmark, Fysikvej,  
Building 310, DK-2800, Kgs. Lyngby, Denmark.

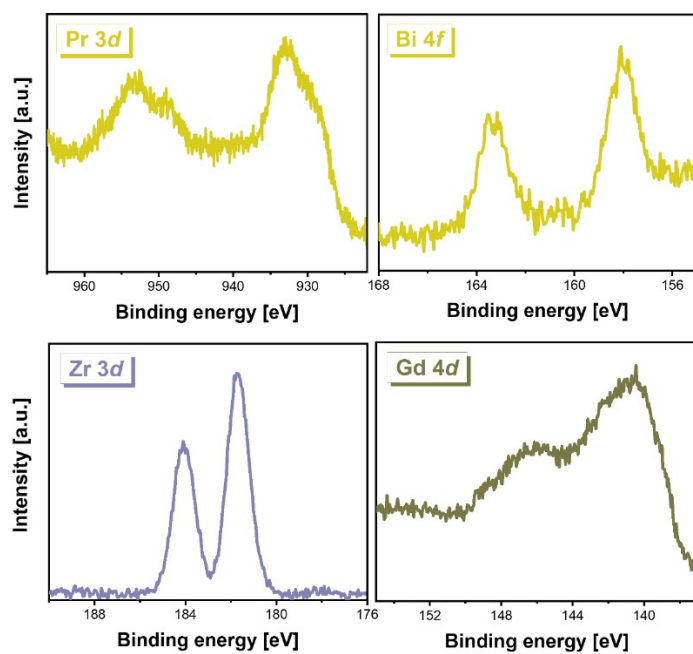

**Figure S1.** Pr  $3d$  and Bi  $4f$  spectra, Zr  $3d$  spectrum and Gd  $4d$  spectrum measured by XPS on the CPBO, CZO and CGO samples, respectively.

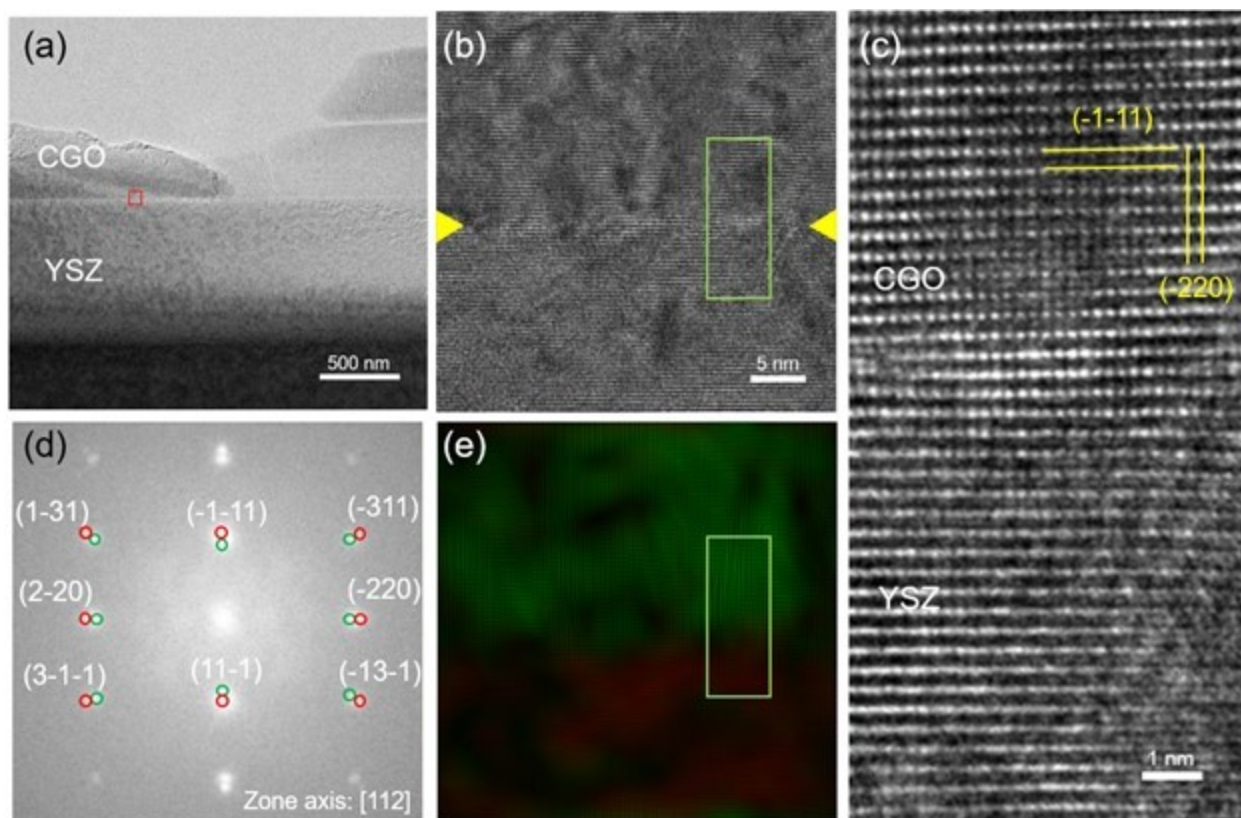

**Figure S2.** **a** TEM image of a cross section of one CGO sample. **b** HRTEM image of the interface region shown in **a**. To guide the eye, yellow arrows indicate the interface. **c** Close-up of the region indicated with green rectangle in **b** and **e**. **d** FFT of **b**. Lattice planes for low miller indices are identified. The indicated spots belong to CGO (green) and YSZ (red). **e** Inversed FFT of regions indicated with green and red circles in **d**.

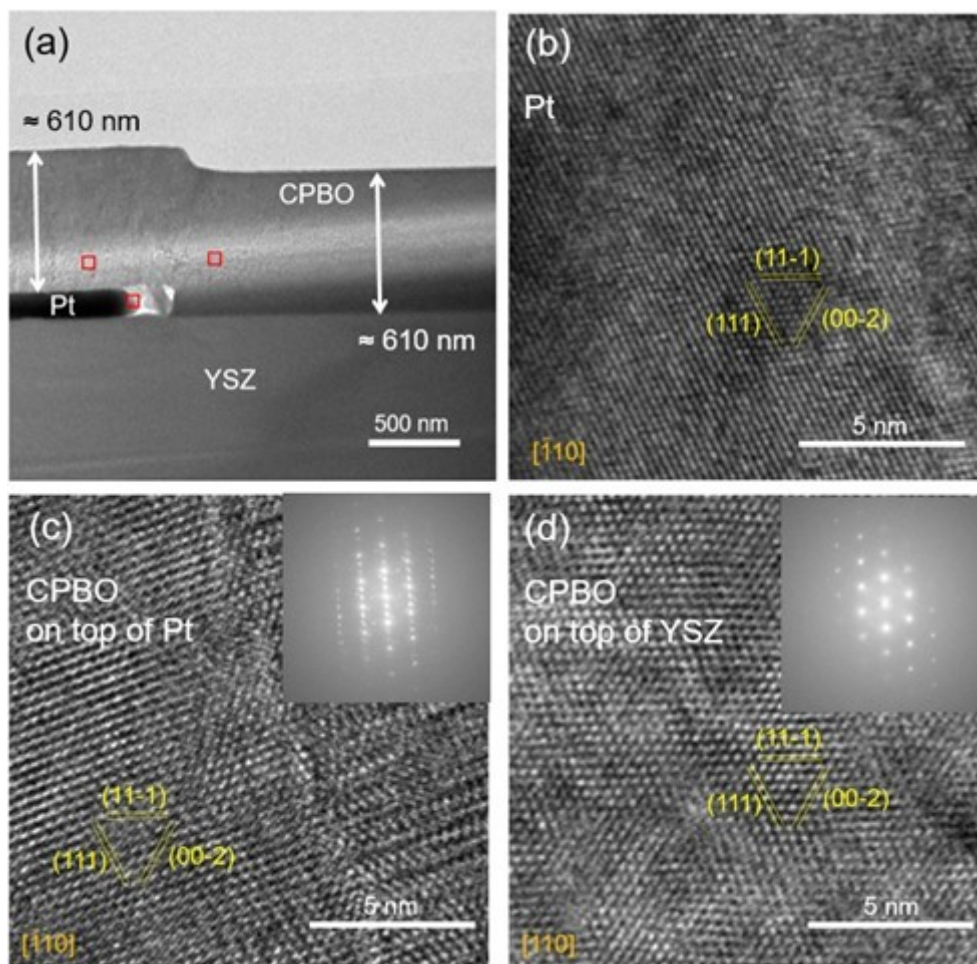

**Figure S3.** **a** TEM image of a cross section of one CPBO sample. **b** HRTEM image of the red rectangle region over the Pt grid shown in **a**. **c** HRTEM image with corresponding FFT of the red rectangle region of the CPBO film over the Pt grid shown in **a**. **d** HRTEM image with corresponding FFT of the red rectangle region of the CPBO film over the YSZ single crystal shown in **a**.

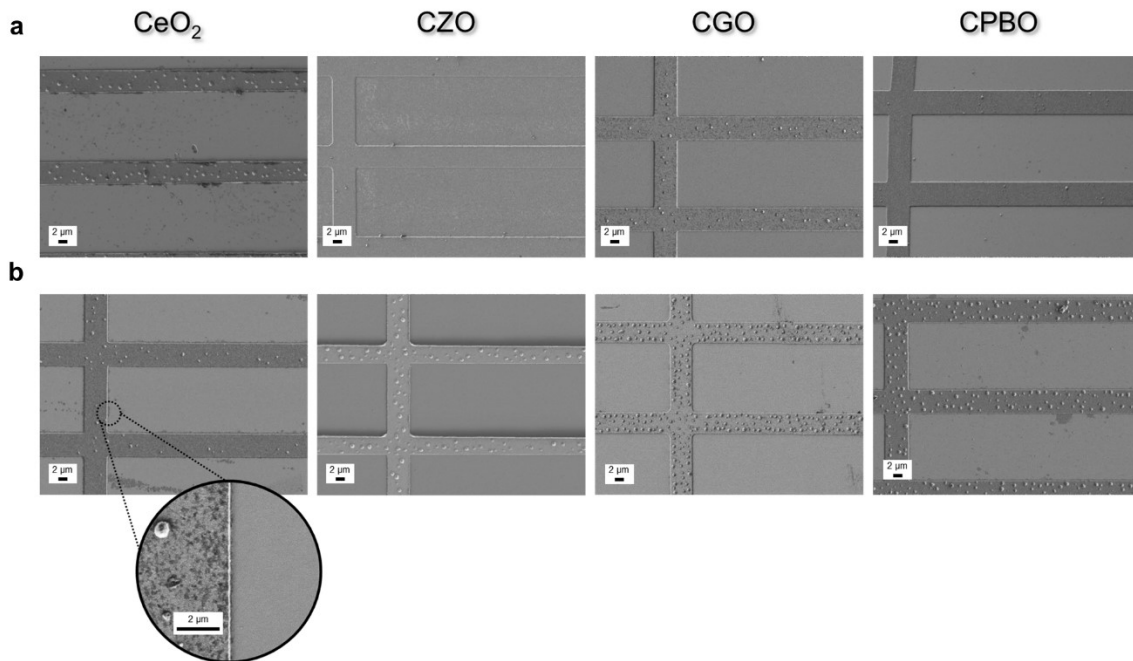

**Figure S4.** SEM images of the top view of the ceria thin films with different doping composition for **a** the as-deposited samples and **b** after the electrochemical testing. The inset shows the different microstructure of the portion of film grown epitaxial to the substrate with respect to the part grown on the Pt grid.

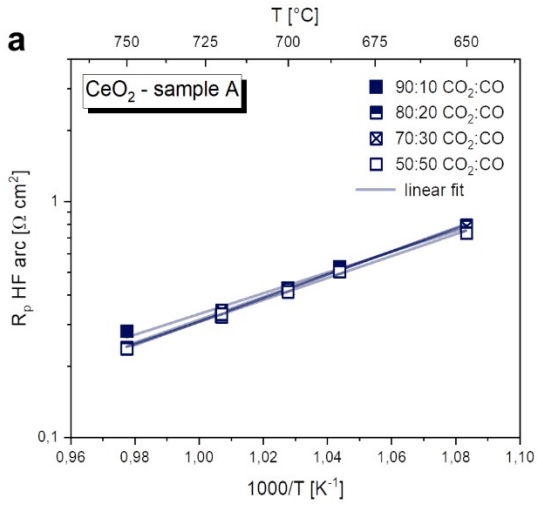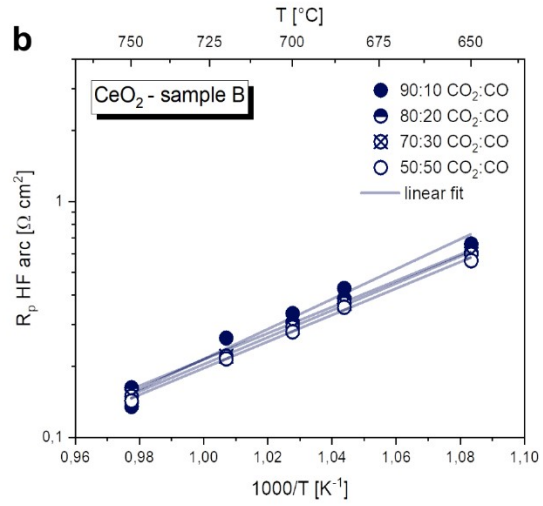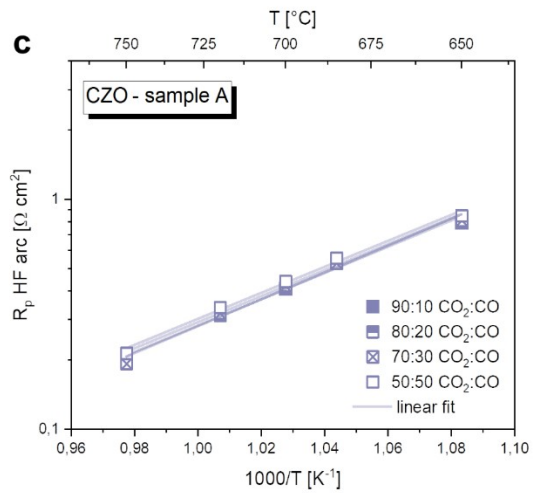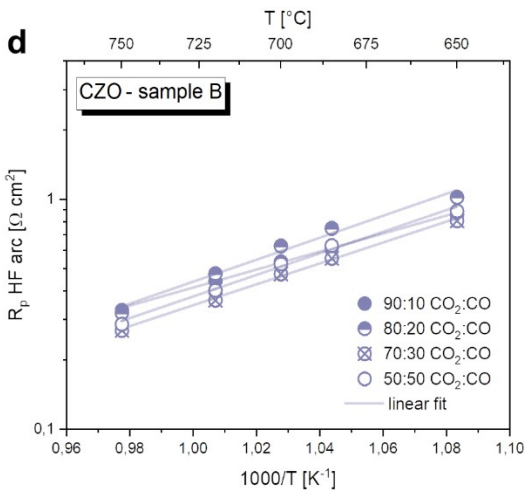

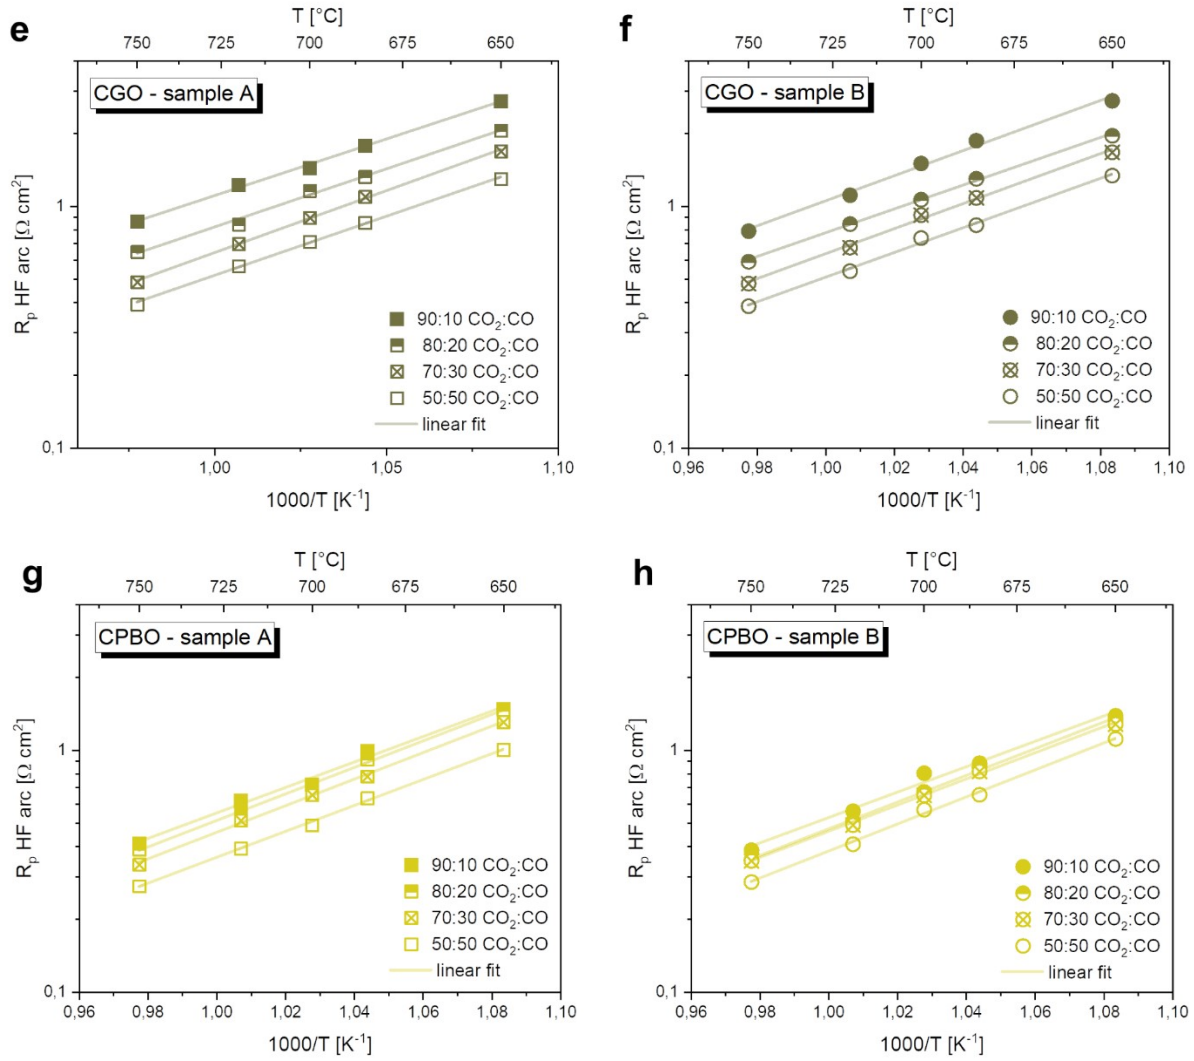

**Fi**

**figure S5.** Polarization resistance as a function of temperature of the high frequency contribution for **a, b** CeO<sub>2</sub>, **c, d** CZO, **e, f** CGO and **g, h** CPBO. The EIS were recorded at OCV in the temperature range between 650 and 750 °C in varying gas feed mixtures.

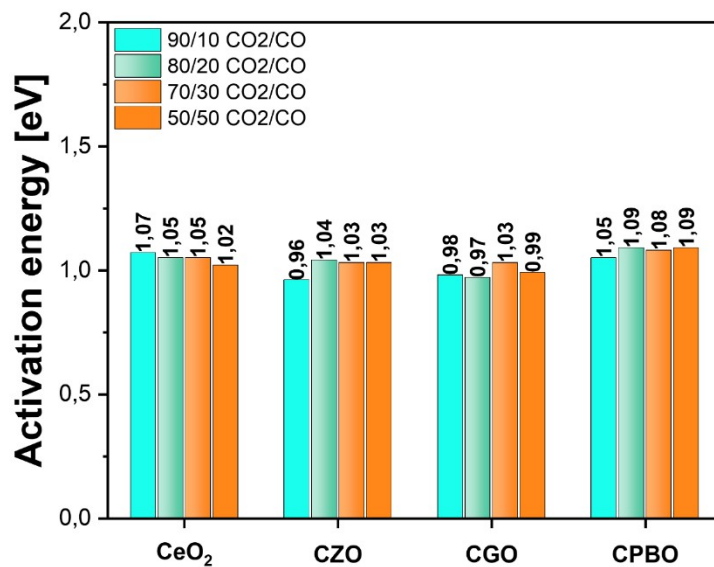

**Figure S6.** Activation energies of the polarization resistances of the HF arc in the temperature range of 650-750 °C for the 4 different electrode compositions in the gas mixtures investigated at OCV. The values are the average of the electrochemical performance of two identical samples for each doping type. Uncertainties fall within  $\pm 0.1$  eV for the all the samples analyzed.



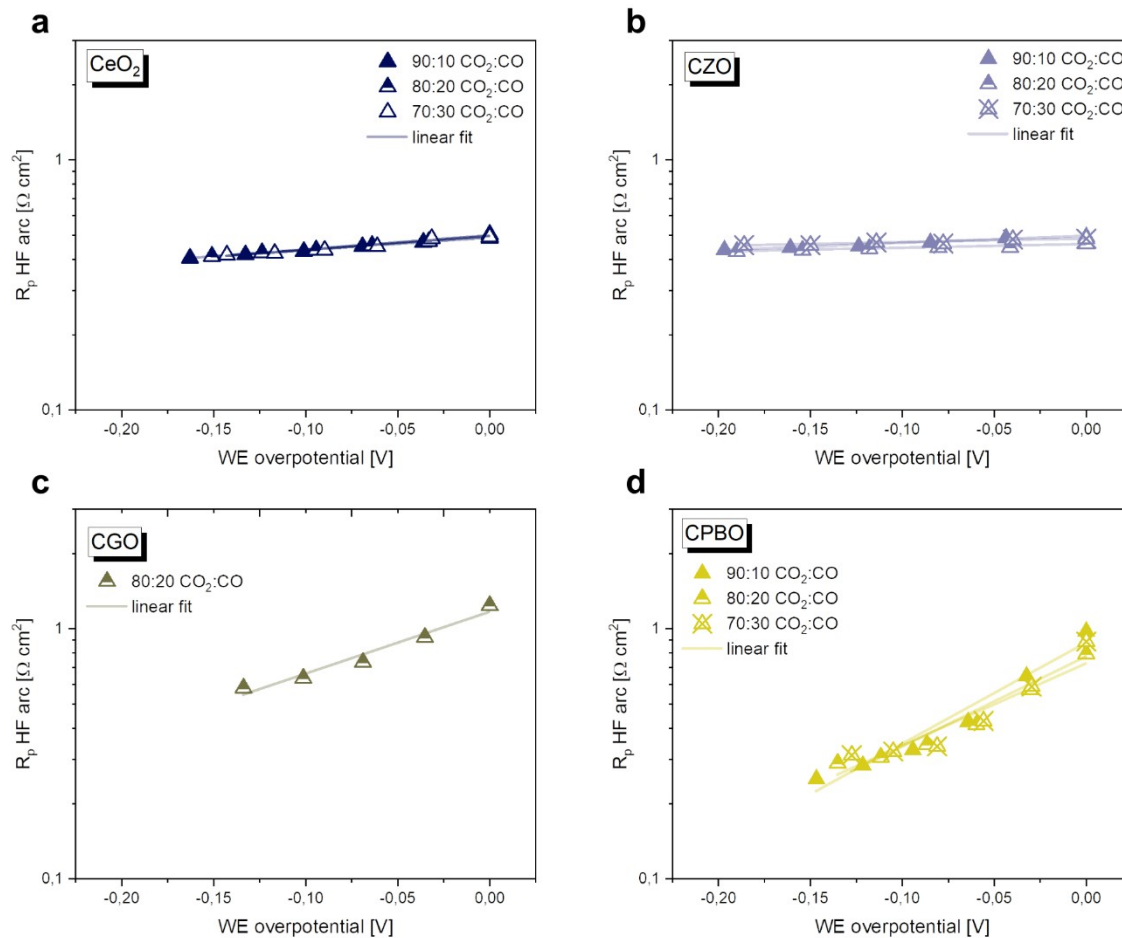

**Figure S7.** Polarization resistance of the HF arc as a function of the WE overpotential in different gas mixtures for one representative sample of **a** CeO<sub>2</sub>, **b** CZO, **c** CGO and **d** CPBO. For CGO only the measurements in 80:20 CO<sub>2</sub>:CO are shown due to a set-up malfunctioning that impeded the recording of part of the data.

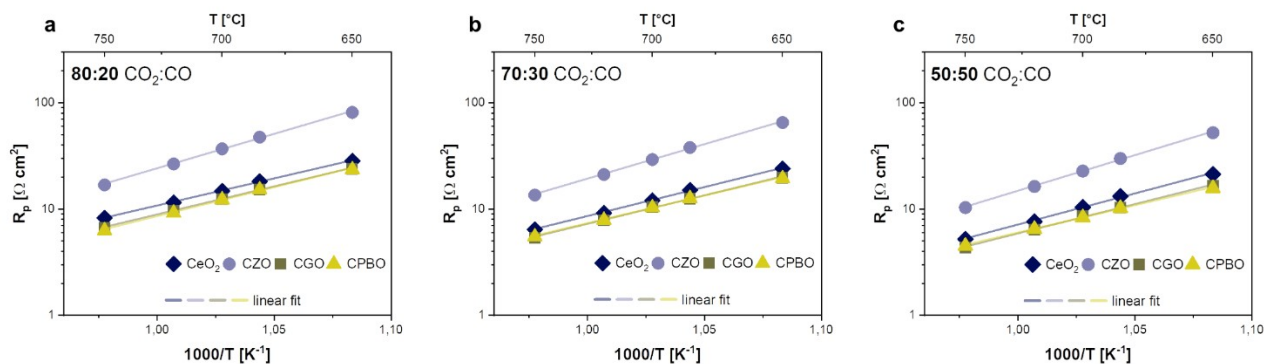

**Figure S8.** Polarization resistance as a function of temperature at OCV for electrochemical cells with different WE doping type in **a** 80:20 CO<sub>2</sub>:CO, **b** 70:30 CO<sub>2</sub>:CO and **c** 50:50 CO<sub>2</sub>:CO. The values are the average of the electrochemical performance of two identical samples for each doping type.

**Note S1.** At each step of applied cathodic polarization, the samples were left equilibrating at the desired potential for 10 minutes while carrying out a chronoamperometry (CA) measurement. This ensured that the steady state was reached before measuring the impedance. From the values of current ( $I_{DC}$ ) flowing between the two electrodes at each given polarization ( $V_{DC}$ ) measured in the CA routine, the overpotential at the working electrode  $\eta$  could be calculated by subtracting the ohmic loss in the electrolyte ( $I_{DC} \cdot R_s$ ), according to **Eq. S1**:

$$\eta = V_{DC} - I_{DC} \cdot R_s \quad \text{Eq. S1}$$

**Table S1:** List of possible combinations of the stoichiometric coefficients and associated values

$$\frac{\partial \log j}{\partial \log p_{O_2}} \Big|_{T,\eta}$$

of

| Sol. nr.  | $\nu_{O,1}$ | $\nu_{O,2}$ | $\nu_{O,3}$ | $\nu_{V,1}$ | $\nu_{V,2}$ | $\nu_{V,3}$ | $\nu_{e,1}$ | $\nu_{e,2}$ | $\nu_{e,3}$ | $\frac{\partial \log j}{\partial \log p_{O_2}} \Big _{T,\eta}$ |
|-----------|-------------|-------------|-------------|-------------|-------------|-------------|-------------|-------------|-------------|----------------------------------------------------------------|
| 1         | 0           | 0           | 0           | 0           | 0           | 1           | 0           | 0           | 2           | 0                                                              |
| 2         | 0           | 0           | 0           | 0           | 0           | 1           | 0           | 1           | 1           | -0.0555555555555556                                            |
| 3         | 0           | 0           | 0           | 0           | 0           | 1           | 0           | 2           | 0           | -0.1111111111111111                                            |
| 4         | 0           | 0           | 0           | 0           | 0           | 1           | 1           | 0           | 1           | -0.1111111111111111                                            |
| <b>5</b>  | <b>0</b>    | <b>0</b>    | <b>0</b>    | <b>0</b>    | <b>0</b>    | <b>1</b>    | <b>1</b>    | <b>1</b>    | <b>0</b>    | <b>-0.1666666666666667</b>                                     |
| 6         | 0           | 0           | 0           | 0           | 0           | 1           | 2           | 0           | 0           | -0.2222222222222222                                            |
| 7         | 0           | 0           | 0           | 0           | 1           | 0           | 0           | 0           | 2           | -0.0277777777777778                                            |
| 8         | 0           | 0           | 0           | 0           | 1           | 0           | 0           | 1           | 1           | -0.0833333333333333                                            |
| 9         | 0           | 0           | 0           | 0           | 1           | 0           | 0           | 2           | 0           | -0.1388888888888889                                            |
| 10        | 0           | 0           | 0           | 0           | 1           | 0           | 1           | 0           | 1           | -0.1388888888888889                                            |
| 11        | 0           | 0           | 0           | 0           | 1           | 0           | 1           | 1           | 0           | -0.1944444444444444                                            |
| 12        | 0           | 0           | 0           | 0           | 1           | 0           | 2           | 0           | 0           | -0.25                                                          |
| 13        | 0           | 0           | 0           | 1           | 0           | 0           | 0           | 0           | 2           | -0.0277777777777778                                            |
| 14        | 0           | 0           | 0           | 1           | 0           | 0           | 0           | 1           | 1           | -0.0833333333333333                                            |
| 15        | 0           | 0           | 0           | 1           | 0           | 0           | 0           | 2           | 0           | -0.1388888888888889                                            |
| 16        | 0           | 0           | 0           | 1           | 0           | 0           | 1           | 0           | 1           | -0.1388888888888889                                            |
| 17        | 0           | 0           | 0           | 1           | 0           | 0           | 1           | 1           | 0           | -0.1944444444444444                                            |
| 18        | 0           | 0           | 0           | 1           | 0           | 0           | 2           | 0           | 0           | -0.25                                                          |
| 19        | 0           | 0           | 1           | 0           | 0           | 1           | 0           | 0           | 2           | 0                                                              |
| 20        | 0           | 0           | 1           | 0           | 0           | 1           | 0           | 1           | 1           | -0.0555555555555556                                            |
| 21        | 0           | 0           | 1           | 0           | 0           | 1           | 0           | 2           | 0           | -0.1111111111111111                                            |
| 22        | 0           | 0           | 1           | 0           | 0           | 1           | 1           | 0           | 1           | -0.1111111111111111                                            |
| <b>23</b> | <b>0</b>    | <b>0</b>    | <b>1</b>    | <b>0</b>    | <b>0</b>    | <b>1</b>    | <b>1</b>    | <b>1</b>    | <b>0</b>    | <b>-0.1666666666666667</b>                                     |
| 24        | 0           | 0           | 1           | 0           | 0           | 1           | 2           | 0           | 0           | -0.2222222222222222                                            |
| 25        | 0           | 0           | 1           | 0           | 1           | 0           | 0           | 0           | 2           | -0.0277777777777778                                            |
| 26        | 0           | 0           | 1           | 0           | 1           | 0           | 0           | 1           | 1           | -0.0833333333333333                                            |
| 27        | 0           | 0           | 1           | 0           | 1           | 0           | 0           | 2           | 0           | -0.1388888888888889                                            |
| 28        | 0           | 0           | 1           | 0           | 1           | 0           | 1           | 0           | 1           | -0.1388888888888889                                            |
| 29        | 0           | 0           | 1           | 0           | 1           | 0           | 1           | 1           | 0           | -0.1944444444444444                                            |
| 30        | 0           | 0           | 1           | 0           | 1           | 0           | 2           | 0           | 0           | -0.25                                                          |
| 31        | 0           | 0           | 1           | 1           | 0           | 0           | 0           | 0           | 2           | -0.0277777777777778                                            |
| 32        | 0           | 0           | 1           | 1           | 0           | 0           | 0           | 1           | 1           | -0.0833333333333333                                            |
| 33        | 0           | 0           | 1           | 1           | 0           | 0           | 0           | 2           | 0           | -0.1388888888888889                                            |
| 34        | 0           | 0           | 1           | 1           | 0           | 0           | 1           | 0           | 1           | -0.1388888888888889                                            |
| 35        | 0           | 0           | 1           | 1           | 0           | 0           | 1           | 1           | 0           | -0.1944444444444444                                            |

|           |          |          |          |          |          |          |          |          |          |                             |
|-----------|----------|----------|----------|----------|----------|----------|----------|----------|----------|-----------------------------|
| 36        | 0        | 0        | 1        | 1        | 0        | 0        | 2        | 0        | 0        | -0.25                       |
| 37        | 0        | 1        | 0        | 0        | 0        | 1        | 0        | 0        | 2        | 0.02777777777777778         |
| 38        | 0        | 1        | 0        | 0        | 0        | 1        | 0        | 1        | 1        | -0.02777777777777778        |
| 39        | 0        | 1        | 0        | 0        | 0        | 1        | 0        | 2        | 0        | -0.08333333333333333        |
| 40        | 0        | 1        | 0        | 0        | 0        | 1        | 1        | 0        | 1        | -0.08333333333333333        |
| 41        | 0        | 1        | 0        | 0        | 0        | 1        | 1        | 1        | 0        | -0.1388888888888889         |
| 42        | 0        | 1        | 0        | 0        | 0        | 1        | 2        | 0        | 0        | -0.19444444444444444        |
| 43        | 0        | 1        | 0        | 0        | 1        | 0        | 0        | 0        | 2        | 0                           |
| 44        | 0        | 1        | 0        | 0        | 1        | 0        | 0        | 1        | 1        | -0.05555555555555556        |
| 45        | 0        | 1        | 0        | 0        | 1        | 0        | 0        | 2        | 0        | -0.11111111111111111        |
| 46        | 0        | 1        | 0        | 0        | 1        | 0        | 1        | 0        | 1        | -0.11111111111111111        |
| <b>47</b> | <b>0</b> | <b>1</b> | <b>0</b> | <b>0</b> | <b>1</b> | <b>0</b> | <b>1</b> | <b>1</b> | <b>0</b> | <b>-0.16666666666666667</b> |
| 48        | 0        | 1        | 0        | 0        | 1        | 0        | 2        | 0        | 0        | -0.22222222222222222        |
| 49        | 0        | 1        | 0        | 1        | 0        | 0        | 0        | 0        | 2        | 0                           |
| 50        | 0        | 1        | 0        | 1        | 0        | 0        | 0        | 1        | 1        | -0.05555555555555556        |
| 51        | 0        | 1        | 0        | 1        | 0        | 0        | 0        | 2        | 0        | -0.11111111111111111        |
| 52        | 0        | 1        | 0        | 1        | 0        | 0        | 1        | 0        | 1        | -0.11111111111111111        |
| <b>53</b> | <b>0</b> | <b>1</b> | <b>0</b> | <b>1</b> | <b>0</b> | <b>0</b> | <b>1</b> | <b>1</b> | <b>0</b> | <b>-0.16666666666666667</b> |
| 54        | 0        | 1        | 0        | 1        | 0        | 0        | 2        | 0        | 0        | -0.22222222222222222        |
| 55        | 1        | 0        | 0        | 0        | 0        | 1        | 0        | 0        | 2        | 0.02777777777777778         |
| 56        | 1        | 0        | 0        | 0        | 0        | 1        | 0        | 1        | 1        | -0.02777777777777778        |
| 57        | 1        | 0        | 0        | 0        | 0        | 1        | 0        | 2        | 0        | -0.08333333333333333        |
| 58        | 1        | 0        | 0        | 0        | 0        | 1        | 1        | 0        | 1        | -0.08333333333333333        |
| 59        | 1        | 0        | 0        | 0        | 0        | 1        | 1        | 1        | 0        | -0.1388888888888889         |
| 60        | 1        | 0        | 0        | 0        | 0        | 1        | 2        | 0        | 0        | -0.19444444444444444        |
| 61        | 1        | 0        | 0        | 0        | 1        | 0        | 0        | 0        | 2        | 0                           |
| 62        | 1        | 0        | 0        | 0        | 1        | 0        | 0        | 1        | 1        | -0.05555555555555556        |
| 63        | 1        | 0        | 0        | 0        | 1        | 0        | 0        | 2        | 0        | -0.11111111111111111        |
| 64        | 1        | 0        | 0        | 0        | 1        | 0        | 1        | 0        | 1        | -0.11111111111111111        |
| <b>65</b> | <b>1</b> | <b>0</b> | <b>0</b> | <b>0</b> | <b>1</b> | <b>0</b> | <b>1</b> | <b>1</b> | <b>0</b> | <b>-0.16666666666666667</b> |
| 66        | 1        | 0        | 0        | 0        | 1        | 0        | 2        | 0        | 0        | -0.22222222222222222        |
| 67        | 1        | 0        | 0        | 1        | 0        | 0        | 0        | 0        | 2        | 0                           |
| 68        | 1        | 0        | 0        | 1        | 0        | 0        | 0        | 1        | 1        | -0.05555555555555556        |
| 69        | 1        | 0        | 0        | 1        | 0        | 0        | 0        | 2        | 0        | -0.11111111111111111        |
| 70        | 1        | 0        | 0        | 1        | 0        | 0        | 1        | 0        | 1        | -0.11111111111111111        |
| <b>71</b> | <b>1</b> | <b>0</b> | <b>0</b> | <b>1</b> | <b>0</b> | <b>0</b> | <b>1</b> | <b>1</b> | <b>0</b> | <b>-0.16666666666666667</b> |
| 72        | 1        | 0        | 0        | 1        | 0        | 0        | 2        | 0        | 0        | -0.22222222222222222        |
